# Supplementary material
Source: PubMed Central journal article supplement (PMC1635089)
Supplement: pnas_0605224103_3.pdf [file pnas_0605224103_3.pdf]

**Table 5. Structures determined in the presence of ligands identified through DSF and DSLS screening**

| Protein name  | Annotation                                                    | Ligand                                               | PDB ID code |
|---------------|---------------------------------------------------------------|------------------------------------------------------|-------------|
| CLK-1         | Human cdc2-like kinase                                        | 10Z-hymenialdisine                                   | 1Z57        |
| CKI-Y3        | Human casein kinase I Y3                                      | Cdk12 inhibitor III                                  | 2CHL        |
| NEK-2         | Human never in mitosis kinase 2                               | SU11652                                              | 2CL1        |
| MAP3K5        | Human MAPERK kinase 3 (kinase domain)                         | Staurosporine                                        | 2CLQ        |
| PV-PF10_0225  | <i>Plasmodium vivax</i> orotidine monophosphate decarboxylase | UMP, 6-aza-UMP                                       | 2FFC, 2GUU  |
| PRKCH         | Human protein kinase C, eta (C2 domain)                       | Glycerol                                             | 2FK9        |
| SIRT5         | Human sirtuin 5 isoform 1                                     | Suramin                                              | 2FZQ        |
| STK-16        | Human serine threonine kinase 16                              | Staurosporine                                        | 2BUJ        |
| FPPS          | Human farnesyl diphosphate synthase                           | Risedronate                                          | 1YQ7, 1YV5  |
| PKM2          | Human pyruvate kinase, muscle                                 | Phenylalanine                                        | 1ZJH        |
| FPPS          | Human farnesyl diphosphate synthase                           | Zoledronate, isopentenyl pyrophosphate and Mg        | 1ZW5        |
| PY02076       | <i>Plasmodium yoelii</i> adenosine deaminase                  | Deoxyguanosine                                       | 2AMX        |
| PKN-PF08_0071 | <i>Plasmodium knowlesi</i> cytosolic superoxide dismutase     | MnCl2                                                | 2AWP        |
| PAPSS2        | ATP kinase domain of human PAPS synthetase                    | ADP                                                  | 2AX4        |
| Pim1          | Human proviral integration site for murine leukemia virus     | Bisindolylmaleimide I                                | 1XWS        |
| Pim2          | Human proviral integration site for murine leukemia virus     | Organometallic Ruthenium half-sandwich complex "HB1" | 2IWI        |
| CKI-Y2        | Human casein kinase I Y2                                      | 5-Iodotubercidin                                     | 2C47        |
| PAK-4         | Human p21(CDKN1A) activated kinase 4                          | Cdk1 inhibitor (CGP74514A)                           | 2CDZ        |
| PAK-5         | Human p21(CDKN1A) activated kinase 5                          | Cdk1 inhibitor (CGP74514A)                           | 2F57        |
