# Supplementary material
Source: PubMed Central journal article supplement (PMC1635089)
Supplement: pnas_0605224103_4.pdf [file pnas_0605224103_4.pdf]

**Table 3.**  
Instrument specifications and set-up

| <b>Specification</b>   | <b>FluoDia T70</b> | <b>Mx3005p</b> | <b>iCycler</b> | <b>Stargazer</b>        |
|------------------------|--------------------|----------------|----------------|-------------------------|
| Measurement principle  | Fluorescence       | Fluorescence   | Fluorescence   | Static light scattering |
| Well number            | 384/96             | 96             | 96             | 384                     |
| Temperature range, °C  | 25 – 75            | 25 – 105       | 10 – 105       | 14 - 80                 |
| Well volume, µl        | 25/100             | 20             | 25             | 50                      |
| Evaporation precaution | Mineral oil layer  | Optical foil   | Optical foil   | Mineral oil layer       |
