# Supplementary material
Source: PubMed Central journal article supplement (PMC1635089)

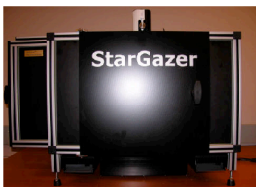

A

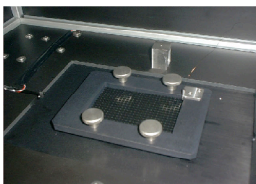

B

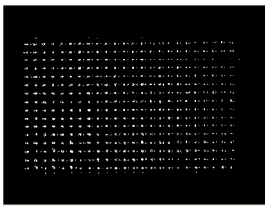

C

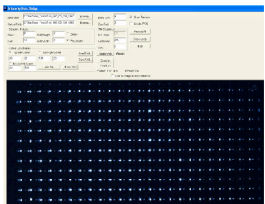

D

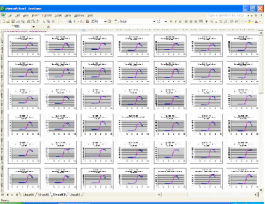

E

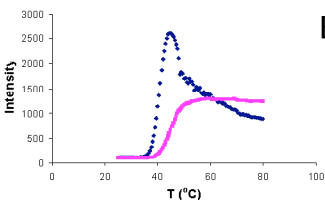

Supplement: pnas_0605224103_1.pdf [file pnas_0605224103_1.pdf]

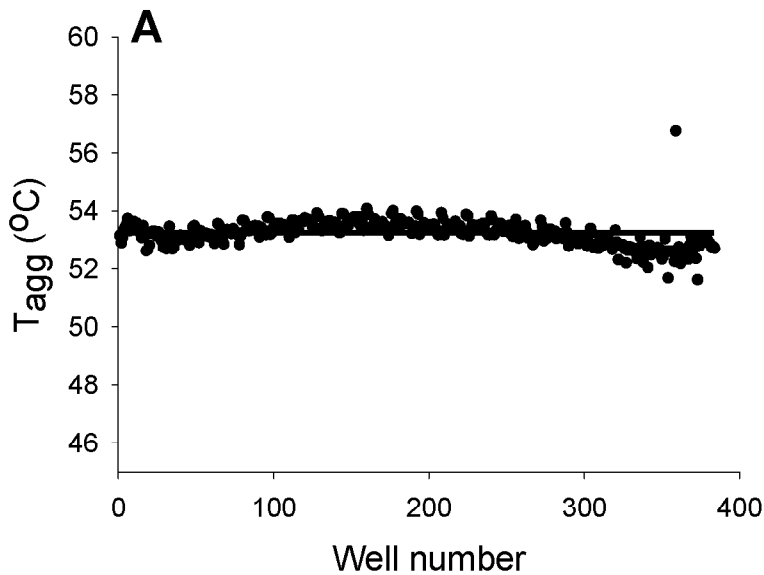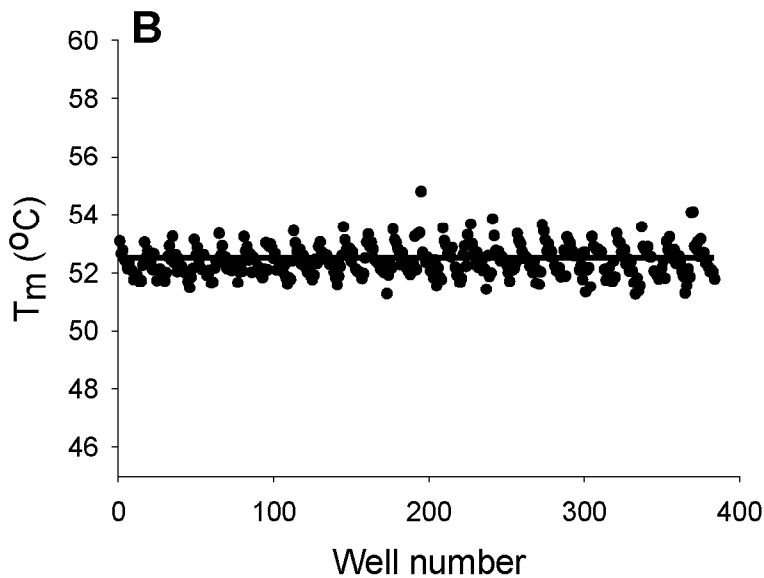

Supplement: pnas_0605224103_2.pdf [file pnas_0605224103_2.pdf]
